# Supplementary material for: Electroanalytical Performance of a Carbon Paste Electrode Modified by Coffee Husks for the Quantification of Acetaminophen in Quality Control of Commercialized Pharmaceutical Tablets
Source: Hindawi journal article supplement (doi:10.1155/2016/1953278), 2016-01-01
Supplement: f1 [file 1953278.f1.docx]

**Figure S1:** Cyclic voltammograms of 25 mg/L APAP at the bare CPE in 0.1 M PBS with different pH values (5.5, 7.4 and 8.6). Scan rate: 100 mV s−1.

**Figure S2:** SWV curves recorded for 25 mg L−1 APAP in 0.1 PBS (pH 7.4) in the presence of different interfering organic compounds. (HQ: Hydroquinon – PAP : Para aminophenol – DA: Dopamine – AscA: Ascorbic acid – AspA : Aspartic acid – Glc : Glucose).
